# Supplementary material for: Approaching “stainless magnesium” by Ca micro-alloying
Source: Royal Society of Chemistry journal article supplement (doi:10.1039/d0mh01380c), 2020-11-24
Supplement: d0mh01380c1.pdf [file d0mh01380c1.pdf]

## Supplementary Information

### **Approaching “Stainless Magnesium” by Ca Micro-Alloying**

Min Deng<sup>a</sup>, Linqian Wang<sup>a</sup>, Daniel Höche<sup>a, \*</sup>, Sviatlana V. Lamaka<sup>a</sup>, Cheng Wang<sup>a</sup>, Darya  
Snihirova<sup>a</sup>, Yiming Jin<sup>b</sup>, Yuhui Zhang<sup>a, c</sup>, Mikhail L. Zheludkevich<sup>a, d</sup>

<sup>a</sup>Magnesium Innovation Center, Helmholtz-Zentrum Geesthacht, 21502 Geesthacht, Germany.

<sup>b</sup> Division of Metallic Biomaterials, Helmholtz-Zentrum Geesthacht, 21502 Geesthacht,  
Germany.

<sup>c</sup> Powder Metallurgy Research Institute, Central South University, 410083 Changsha, China.

<sup>d</sup>Institute of Materials Science, Faculty of Engineering, Kiel University, 24143 Kiel, Germany.

\*Corresponding author: Dr. Daniel Höche ([daniel.hoeche@hzg.de](mailto:daniel.hoeche@hzg.de)).

## Supplementary Figures

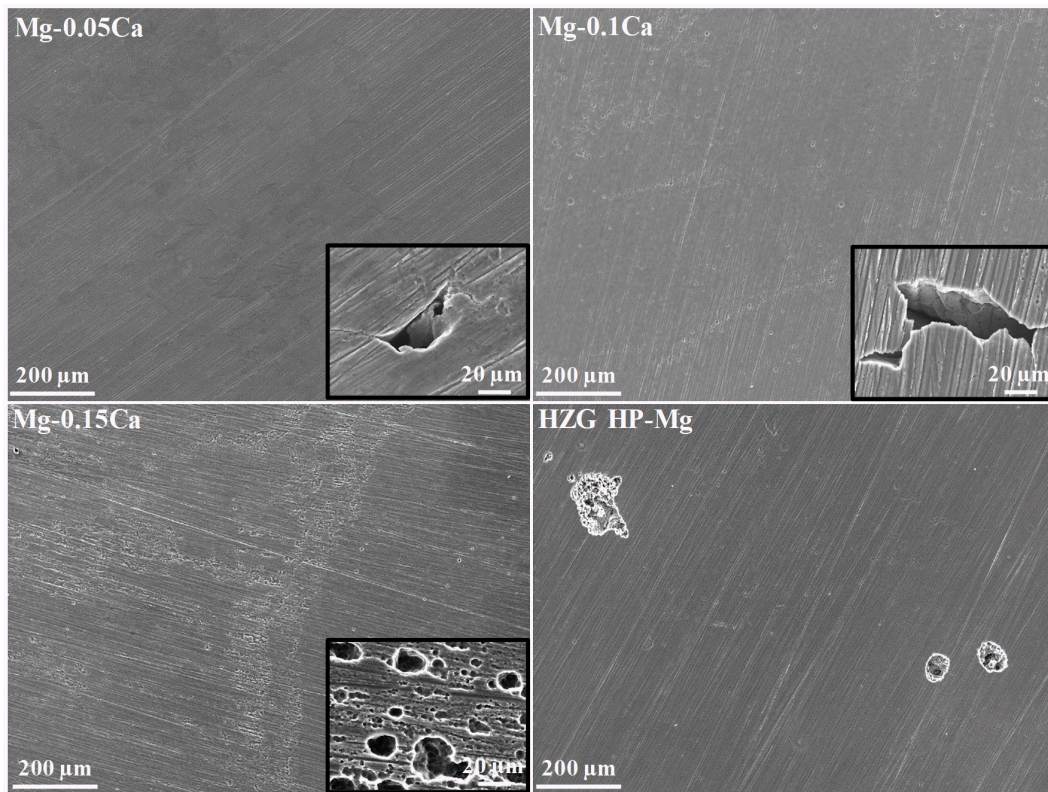

Fig. S1 Surface morphologies of micro-alloyed Mg-Ca and HZG HP-Mg after immersion in 3.5 wt% NaCl solution for 7 days and removing corrosion products with diluted chromic acid.

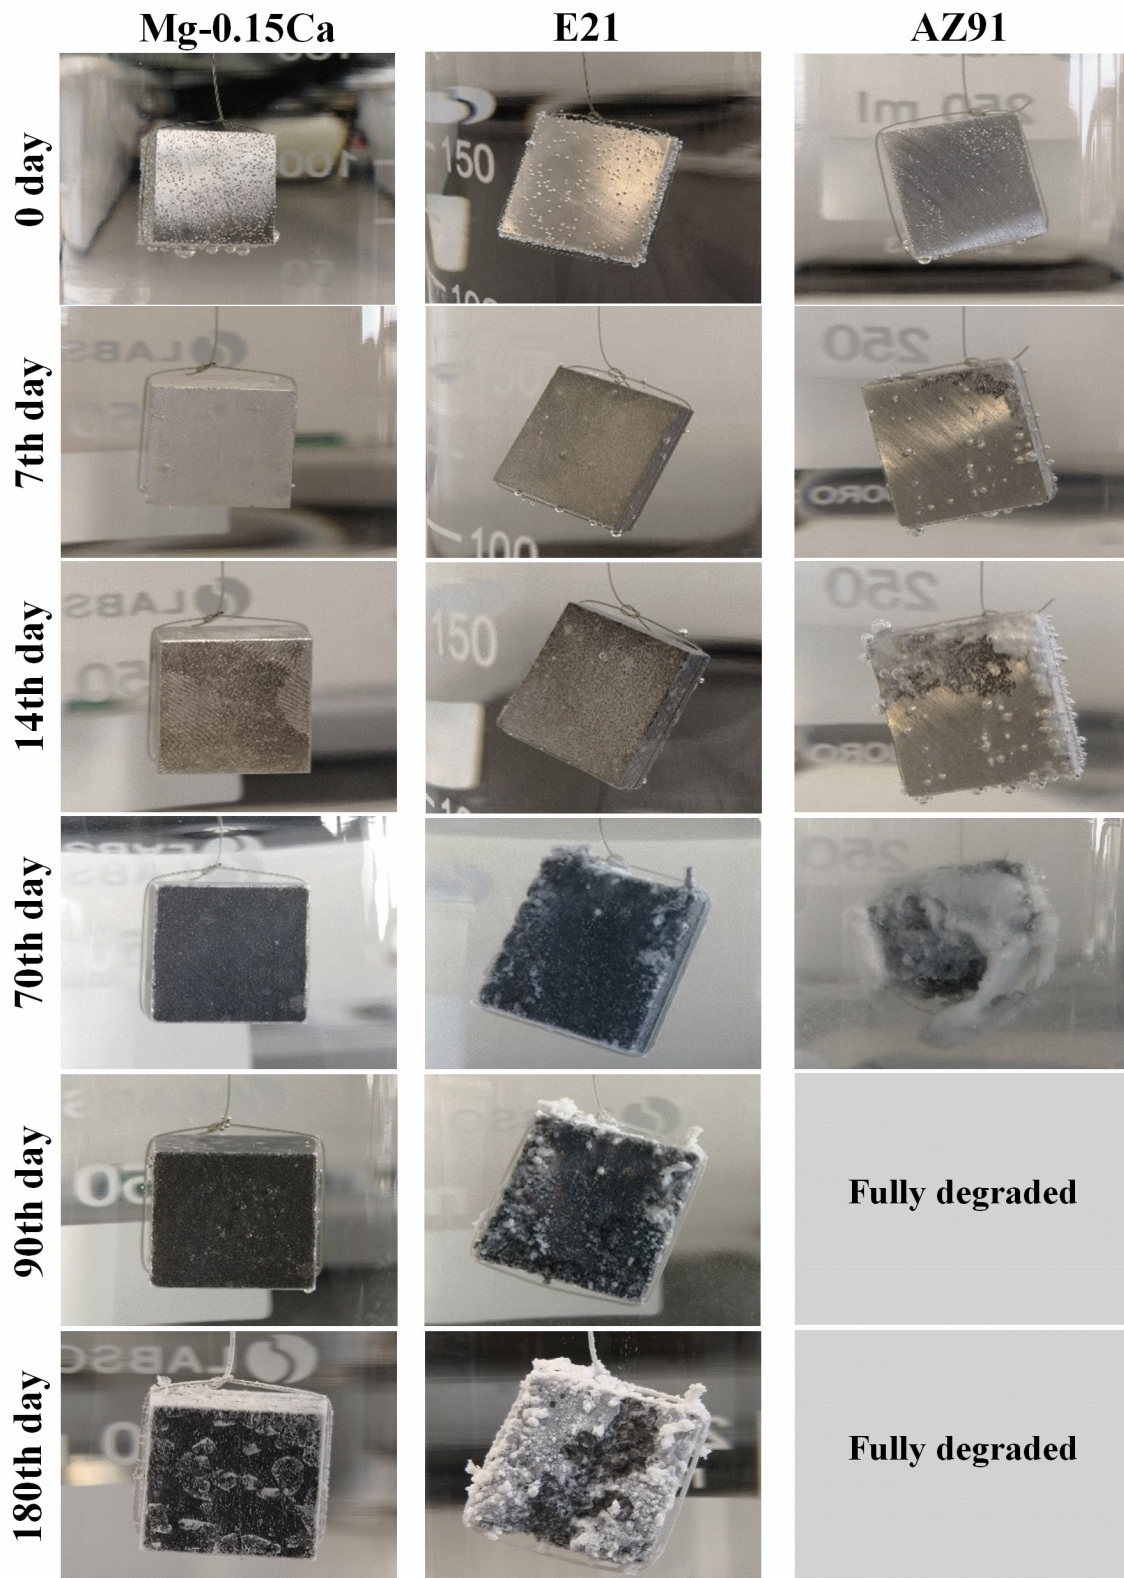

Fig. S2 Surface appearance alteration with time with regard to Mg-0.15Ca, E21 and AZ91 alloys amid immersion in 3.5 wt% NaCl solution for 6 months. The solution was refreshed after 6 months since it became turbid due to precipitation of corrosion products.



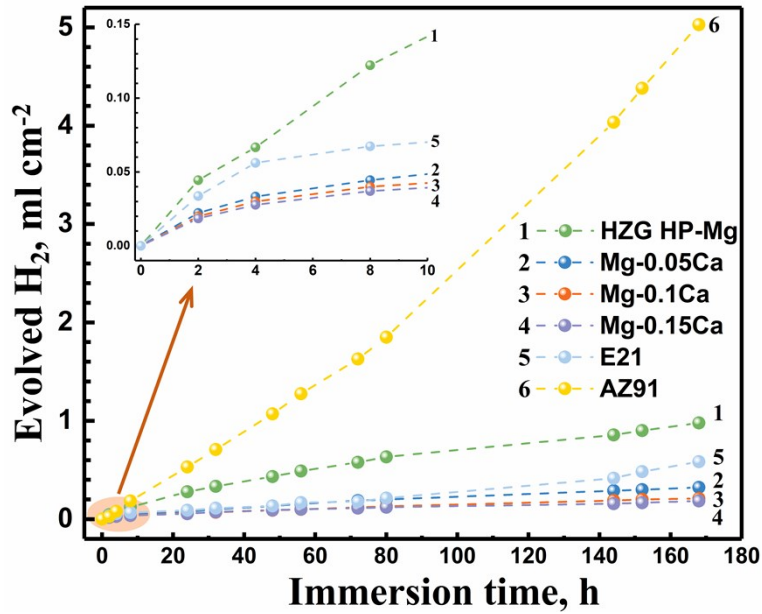

Fig. S3 Hydrogen evolution of micro-alloyed Mg-Ca during immersion in 3.5 wt% NaCl solution for 7 days in comparison to HZG HP-Mg, E21 and AZ91 alloys.

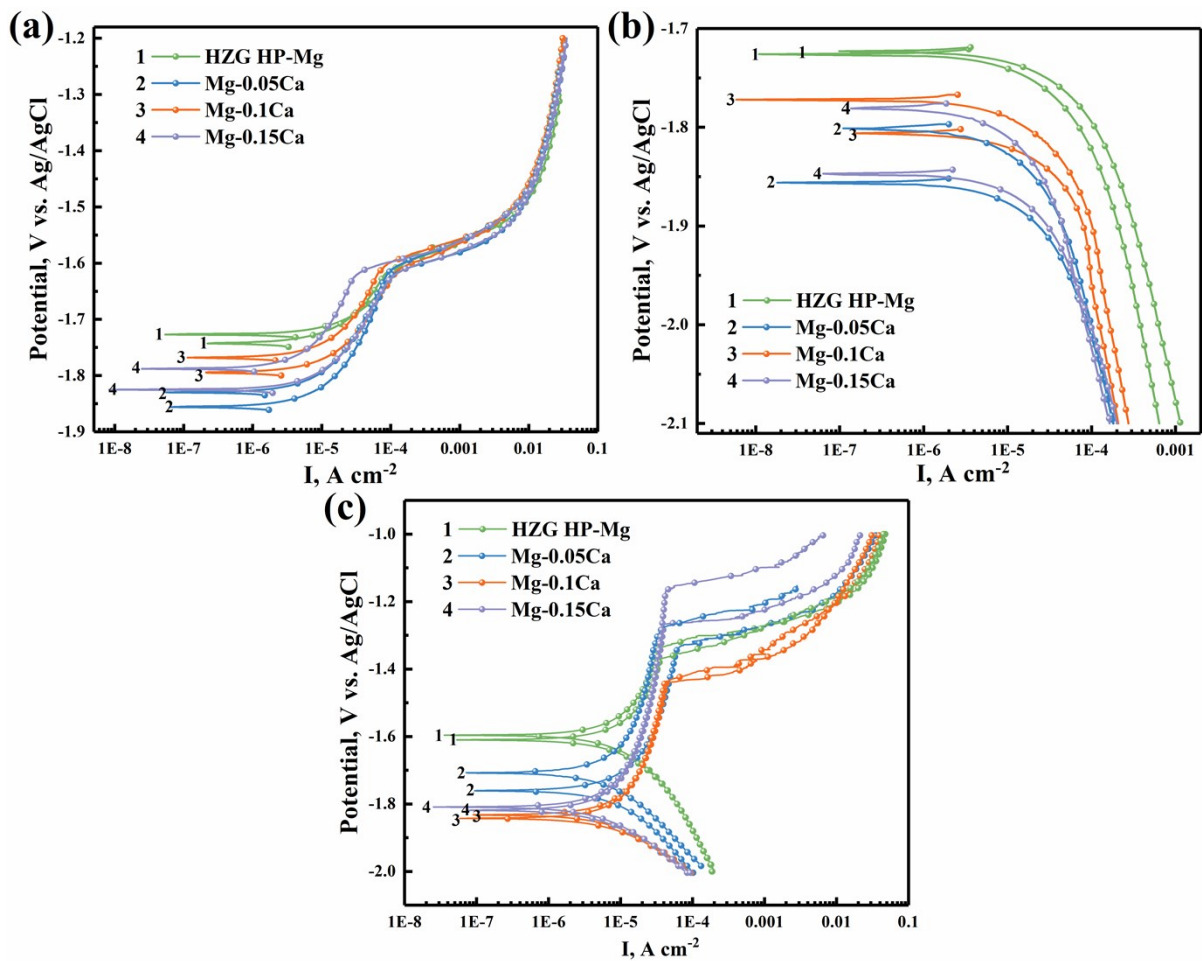

Fig. S4 Data of replicated polarization measurements in 3.5 wt% NaCl solution. (a) Anodic polarization curves after 1 h immersion. (b) Cathodic polarization curves after 1 h immersion. (c) Polarization curves after immersion for 7 days obtained by direct scanning.

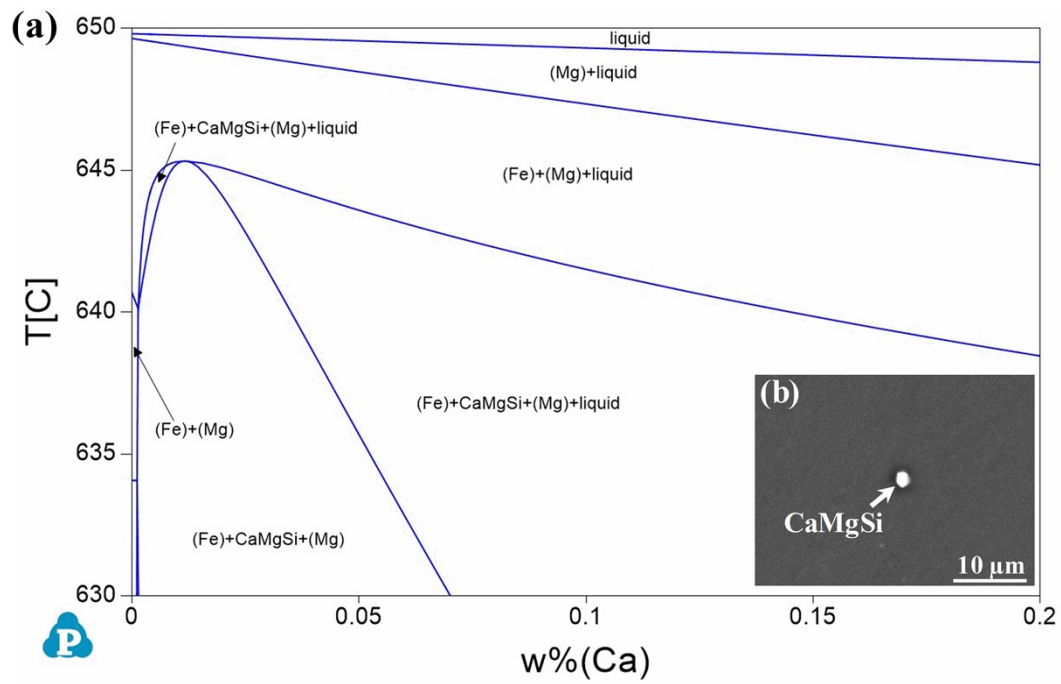

Fig. S5 (a) Calculated Mg-Ca-Fe-Si phase diagram at constant 20 ppm Fe and 50 ppm Si via Pandat program with the PanMg2017 database. (b) SEM (BSE) image of Mg-0.1wt%Ca alloy.

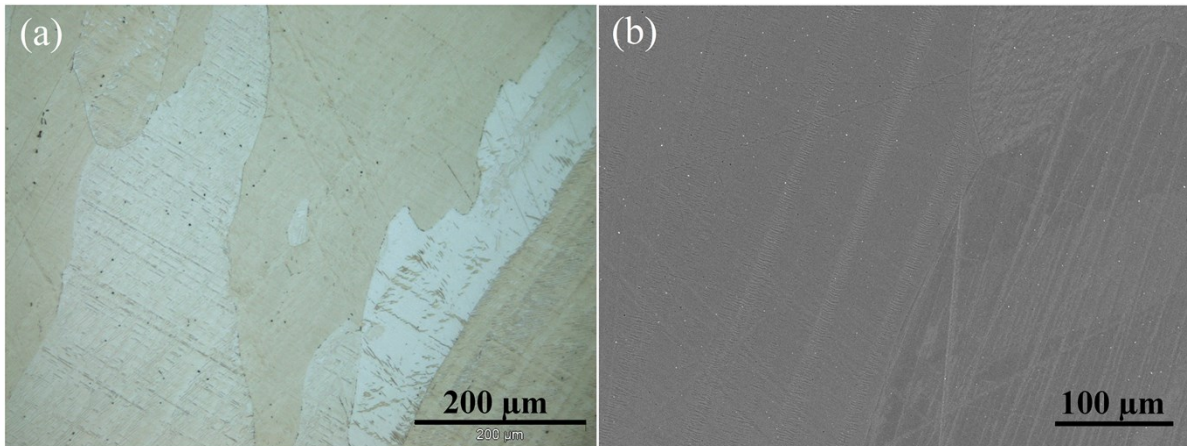

Fig. S6 Microstructure of Mg-0.1wt%Ca lean alloy: (a) OM image; (b) SEM image.

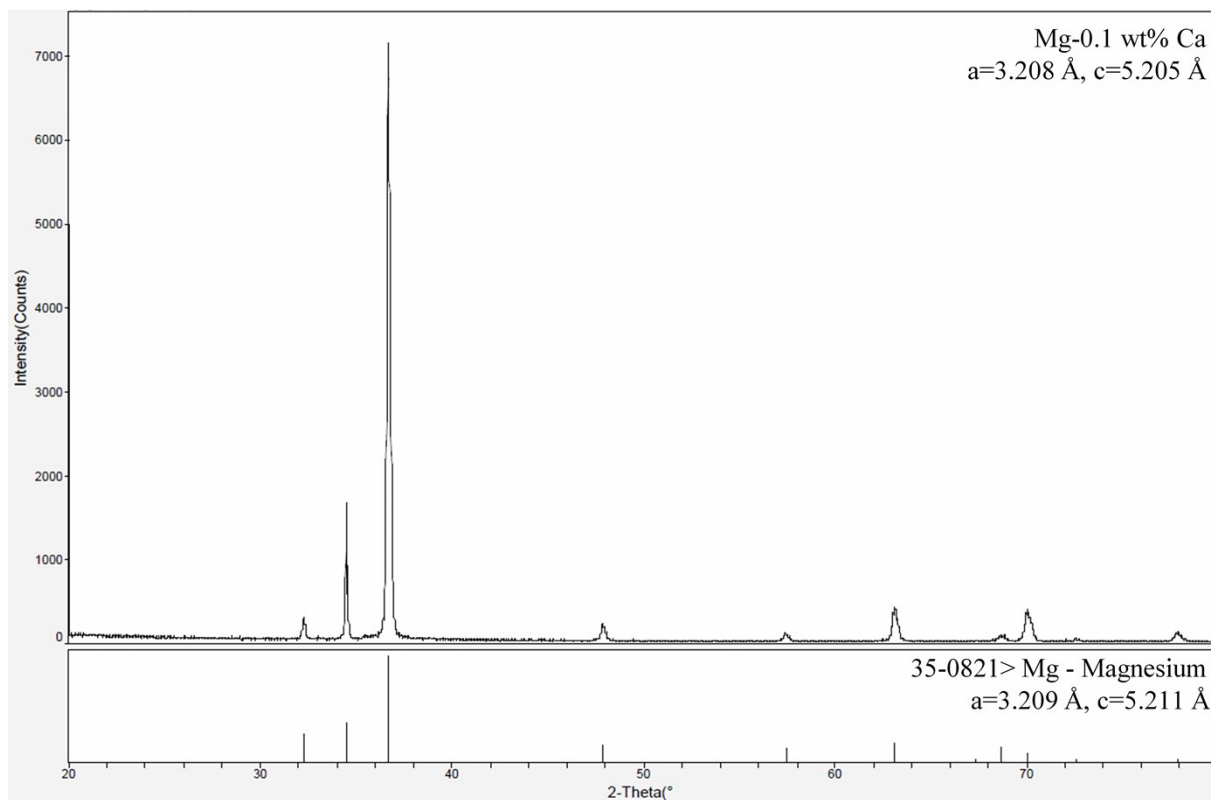

Fig. S7 XRD pattern of Mg-0.1wt% Ca lean alloy. Calculated lattice parameters from the XRD pattern are also displayed.

## Supplementary Tables

Table S1 Experimental details of immersion tests for the determination of corrosion rates of diverse Mg materials in the present work. All the samples were hung with fishing line in pH-unbuffered 3.5 wt% NaCl solution. Initial mass indicates the mass of ground samples before immersion. Final mass is the mass of samples after immersion and removal of corrosion products with chromic acid. The corrosion rates were calculated based on the mass loss.

| Specimen      | Duration (d) | Surface area (cm <sup>2</sup> ) | Initial mass (g) | Final mass (g) | Mass loss (mg) | Corrosion rate (mm y <sup>-1</sup> ) |
|---------------|--------------|---------------------------------|------------------|----------------|----------------|--------------------------------------|
| Mg-0.05Ca-1   | 7            | 10.0                            | 3.9919           | 3.9875         | 4.4            | 0.13                                 |
| Mg-0.05Ca-2   | 7            | 9.0                             | 3.4115           | 3.4077         | 3.8            | 0.13                                 |
| Mg-0.05Ca-3   | 7            | 8.9                             | 3.3327           | 3.3314         | 1.3            | 0.04                                 |
| Mg-0.1Ca-1    | 7            | 10.2                            | 4.0835           | 4.0810         | 2.5            | 0.07                                 |
| Mg-0.1Ca-2    | 7            | 10.0                            | 4.0362           | 4.0343         | 1.9            | 0.06                                 |
| Mg-0.1Ca-3    | 7            | 8.6                             | 3.0998           | 3.0975         | 2.3            | 0.08                                 |
| Mg-0.15Ca-1   | 7            | 10.8                            | 4.0320           | 4.0287         | 3.3            | 0.09                                 |
| Mg-0.15Ca-2   | 7            | 10.8                            | 4.0009           | 3.9983         | 2.6            | 0.07                                 |
| Mg-0.15Ca-3   | 7            | 10.4                            | 3.8599           | 3.8575         | 2.4            | 0.07                                 |
| HZG HP-Mg-1   | 7            | 11.6                            | 3.4161           | 3.4059         | 10.2           | 0.26                                 |
| HZG HP-Mg-2   | 7            | 9.0                             | 2.9360           | 2.9263         | 9.7            | 0.32                                 |
| HZG HP-Mg-3   | 7            | 9.2                             | 3.0261           | 3.0177         | 8.4            | 0.27                                 |
| Elektron 21-1 | 7            | 8.9                             | 2.2104           | 2.2040         | 6.4            | 0.22                                 |
| Elektron 21-2 | 7            | 9.3                             | 2.3063           | 2.3000         | 6.3            | 0.20                                 |
| Elektron 21-3 | 7            | 9.2                             | 2.2657           | 2.2567         | 9.0            | 0.29                                 |
| AZ91-1        | 7            | 11.1                            | 4.3827           | 4.3006         | 82.1           | 2.22                                 |
| AZ91-2        | 7            | 11.3                            | 4.5037           | 4.4406         | 63.1           | 1.68                                 |
| AZ91-3        | 7            | 11.8                            | 4.7876           | 4.7342         | 53.4           | 1.36                                 |
| Mg-0.05Ca-4   | 15           | 8.5                             | 2.8342           | 2.8307         | 3.5            | 0.06                                 |
| Mg-0.1Ca-4    | 15           | 8.5                             | 3.0027           | 2.9983         | 4.4            | 0.07                                 |
| Mg-0.15Ca-4   | 15           | 10.7                            | 3.9801           | 3.9735         | 6.6            | 0.09                                 |
| HZG HP-Mg-4   | 15           | 10.9                            | 3.9338           | 3.9194         | 14.4           | 0.19                                 |

**Table S2** Corrosion rates of various Mg-Al-Zn (AZ), RE-containing (Mg-RE), Mg-Li based and newly proposed low-alloyed Mg-X (X = As, Ge, Sn, Bi, Pb and Sb) alloys collected from literatures. Corrosion rates were determined by mass loss (ML) or hydrogen evolution (HE) in different solutions (1, 3.5 wt% NaCl; 2, 3.5 wt% NaCl saturated with Mg(OH)<sub>2</sub>; 3, 4 wt% NaCl; 4, 5 wt% NaCl; 5, 5 wt% NaCl saturated with Mg(OH)<sub>2</sub>; 6, 0.1M NaCl; 7, 0.5 M NaCl; 8, 0.6 M NaCl). All Mg alloys were either cast or treated by specified processing.

| Mg alloy | Alloying load<br>(wt%) | Condition                                      | Solution | Method | Corrosion rate<br>(mm y <sup>-1</sup> ) | Reference |
|----------|------------------------|------------------------------------------------|----------|--------|-----------------------------------------|-----------|
| AZ61-Ca  | 7.0                    | extruded                                       | 8        | ML     | 0.71                                    | 1         |
|          | 7.1                    |                                                |          |        | 1.69                                    |           |
|          | 7.5                    |                                                |          |        | 1.86                                    |           |
| AZ31B    | 4.5                    | extruded with<br>varied<br>extrusion<br>ratios | 3        | ML     | 3.51                                    | 2         |
|          |                        |                                                |          |        | 1.56                                    |           |
|          |                        |                                                |          |        | 2.36                                    |           |
|          |                        |                                                |          |        | 2.20                                    |           |
| AZ31B    | 4.0                    | rolled                                         | 1        | ML     | 210                                     | 3         |
|          |                        | rolled and heat<br>treated                     |          |        | 178                                     |           |
| AZ31-Ca  | 4.0                    | extruded                                       | 2        | ML     | 10                                      | 4         |
|          | 4.05                   |                                                |          |        | 11                                      |           |
|          | 4.1                    |                                                |          |        | 8                                       |           |
|          | 4.2                    |                                                |          |        | 7.4                                     |           |
| AZ91-Ti  | 10.2                   | as-cast                                        | 1        | ML     | 74.13                                   | 5         |
|          | 10.5                   |                                                |          |        | 10.92                                   |           |
| AZ31     | 4.0                    | extruded                                       | 1        | ML     | 2.35                                    | 6         |
|          |                        | rolled                                         |          |        | 1.51                                    |           |
|          |                        | rolled and heat<br>treated                     |          |        | 1.23                                    |           |
|          |                        | 1.05                                           |          |        |                                         |           |
| AZ31     | 4.7                    | extruded                                       | 1        | ML     | 29                                      | 7         |
|          |                        | rolled                                         |          |        | 18                                      |           |
|          |                        | 8                                              |          |        |                                         |           |
| AZ80     | 9.1                    | rolled                                         | 1        | ML     | 4                                       | 8         |
|          |                        | friction stir<br>processed                     |          |        | 2                                       |           |
| AZ91     | 10.2                   | as-cast                                        | 1        | HE     | 9.45                                    | 9         |
| AZ91     | 10.0                   | as-cast                                        | 4        | ML     | 0.96                                    | 10        |
| AZ91     | 9.8                    | as-cast                                        | 1        | ML     | 0.2                                     | 11        |
| AZ80     | 8.8                    | chill as-cast                                  |          |        | 0.15                                    |           |
| AZ31     | 4.1                    | wrought                                        |          |        | 12.6                                    |           |
| AZ91-Nd  | 9.6                    | extruded                                       | 1        | ML     | 2.94                                    | 12        |



|            |      |              |   |    |       |    |
|------------|------|--------------|---|----|-------|----|
|            | 9.5  |              |   |    | 0.38  |    |
|            | 10.2 |              |   |    | 1.05  |    |
| AZ91D      | 9.3  | die-cast     | 2 | HE | 0.12  | 13 |
| AZ80       | 8.9  | as-cast      | 2 | HE | 0.25  | 14 |
| AZ91D      | 10.0 | thixomolded  | 4 | HE | 0.17  | 15 |
| MRI153M    | 11.1 |              |   |    | 0.68  |    |
| AZ91       | 10.7 | as-cast      | 1 | HE | 4.8   | 16 |
| AZ91-Ce    | 10.3 |              |   |    | 0.21  |    |
|            | 11.2 |              |   |    | 0.29  |    |
|            | 11.7 |              |   |    | 0.09  |    |
| AZ91-La    | 10.5 |              |   |    | 0.23  |    |
|            | 10.6 |              |   |    | 0.23  |    |
|            | 12.2 |              |   |    | 0.08  |    |
| AZ91       | 10.3 | as-cast      | 1 | ML | 5.7   | 17 |
| AZ91-Sb    | 10.6 |              |   |    | 5.2   |    |
| AZ91-Si    | 10.1 |              |   |    | 6.7   |    |
| AZ91-Sb/Si | 10.7 |              |   |    | 3.9   |    |
| AZ63       | 8.4  | -            | 8 | ML | 20    | 18 |
| AZ91D      | 10.1 | die-as-cast  | 4 | ML | 3     | 19 |
|            |      |              |   |    | 4     |    |
|            |      |              |   |    | 6     |    |
| Mg-Li      | 4.0  | extruded     | 6 | ML | 1.85  | 20 |
|            | 7.5  |              |   |    | 3.38  |    |
|            | 14.0 |              |   |    | 0.86  |    |
| Mg-Li-Al   | 6.1  | extruded and | 1 | ML | 40.95 | 21 |
|            | 6.0  | then rolled  |   |    | 35.7  |    |
|            | 5.9  |              |   |    | 27.3  |    |
|            | 6.0  |              |   |    | 16.8  |    |
|            | 5.7  |              |   |    | 10.5  |    |
| Mg-Li-Al-Y | 12.6 | as-cast      | 1 | ML | 3.04  | 22 |
|            | 14.0 |              |   |    | 7.43  |    |
|            | 17.0 |              |   |    | 3.27  |    |
|            | 6.0  |              |   |    | 74.21 |    |
|            | 9.0  |              |   |    | 2.34  |    |
|            | 10.6 |              |   |    | 17.6  |    |
|            | 12.0 |              |   |    | 3.08  |    |
|            | 13.6 |              |   |    | 2.04  |    |
|            | 15.0 |              |   |    | 2.76  |    |
| Mg-Li-Y-Zn | 16.4 | extruded     | 1 | ML | 20.54 | 23 |

|                       |      |                                                                          |   |    |                                              |    |
|-----------------------|------|--------------------------------------------------------------------------|---|----|----------------------------------------------|----|
|                       | 9.9  |                                                                          |   |    | 7.56                                         |    |
|                       | 13.2 |                                                                          |   |    | 4.62                                         |    |
| Mg-Li-Al-Zr-Y         | 15.1 | rolled<br>quenched<br>aged                                               | 6 | ML | 0.8<br>4.2<br>1.68                           | 24 |
| Mg-Li-Al-RE           | 14.5 | as-cast                                                                  | 7 | ML | 6.47                                         | 25 |
| Mg-Li-Al-Zn-Zr        | 16.2 | heat treated                                                             | 1 | ML | 17.85                                        | 26 |
|                       | 13.2 |                                                                          |   |    | 6.3                                          |    |
|                       | 10.2 |                                                                          |   |    | 12.6                                         |    |
| Mg-Li-Al-Zn-Zr        | 16.2 | extruded                                                                 | 1 | ML | 21                                           | 27 |
|                       | 13.2 |                                                                          |   |    | 4.2                                          |    |
|                       | 10.2 |                                                                          |   |    | 7.56                                         |    |
| Mg-Li-Al-Zn-Nd-<br>Zr | 17.5 | heat treated<br>extruded                                                 | 1 | ML | 210<br>94.5                                  | 28 |
| Mg-Li                 | 8.9  | heat treated<br>as-cast                                                  | 6 | ML | 1.47<br>1.68                                 | 29 |
| EV31                  | 4.9  | heat treated                                                             | 2 | ML | 0.88                                         | 30 |
| WE43                  | 6.2  |                                                                          |   |    | 0.23                                         |    |
| ZE41                  | 6.2  |                                                                          |   |    | 8.5                                          |    |
| Mg-Al-Nd              | 5.2  | die-as-cast                                                              | 4 | ML | 0.32                                         | 31 |
| EW75                  | 13.5 | heat treated<br>compressed                                               | 1 | ML | 2.03<br>1.32                                 | 32 |
| Mg-Y-Nd               | 7.0  | friction stir<br>processed<br>as-rolled<br>heat treated<br>after rolling | 1 | ML | 0.10<br>0.13<br>0.23<br>0.38                 | 33 |
| Mg-Gd-Y-Zr            | 9.4  | heat treated                                                             | 4 | ML | 1.05                                         | 34 |
|                       | 11.4 |                                                                          |   |    | 1.68                                         |    |
|                       | 13.4 |                                                                          |   |    | 3.57                                         |    |
|                       | 15.4 |                                                                          |   |    | 2.63                                         |    |
| WE43                  | 6.8  | heat treated                                                             | 2 | HE | 0.7<br>0.36                                  | 35 |
| Mg-Nd-Zn-Zr           | 3.6  | as-cast<br>heat treated                                                  | 4 | ML | 0.41<br>2.75<br>0.24<br>0.54<br>0.30<br>0.65 | 10 |

|               |      |                         |   |    |       |    |
|---------------|------|-------------------------|---|----|-------|----|
| Mg-Y          | 2.0  | as-cast                 | 6 | HE | 4     | 36 |
|               | 3.0  |                         |   |    | 20    |    |
|               | 4.0  |                         |   |    | 30    |    |
|               | 7.0  |                         |   |    | 40    |    |
| Mg-Gd-Y-Nd-Zr | 8.2  | extruded                | 5 | ML | 0.95  | 37 |
|               | 8.9  |                         |   |    | 0.85  |    |
|               | 9.0  |                         |   |    | 1.05  |    |
|               | 9.6  |                         |   |    | 1.3   |    |
| Mg-Y          | 5.0  | sputter<br>deposited    | 2 | ML | 0.35  | 38 |
|               | 10.0 |                         |   |    | 0.69  |    |
|               | 20.0 |                         |   |    | 0.85  |    |
|               | 40.0 |                         |   |    | 0.53  |    |
| Mg-Gd         | 5.0  |                         |   |    | 0.79  |    |
|               | 10.0 |                         |   |    | 0.78  |    |
|               | 20.0 |                         |   |    | 0.4   |    |
| Elektron 21   | 4.8  | as-cast<br>heat treated | 2 | ML | 0.19  | 39 |
|               |      |                         |   |    | 0.15  |    |
|               |      |                         |   |    | 0.11  |    |
|               |      |                         |   |    | 0.12  |    |
|               |      |                         |   |    | 0.14  |    |
| ZE41          | 5.0  | as-cast                 | 6 | HE | 2.3   | 40 |
| Mg-Gd         | 5.0  | rolled                  | 2 | ML | 1     | 41 |
| Mg-Nd         | 0.6  |                         |   |    | 3.75  |    |
| Mg-La         | 0.7  |                         |   |    | 4.39  |    |
| Mg-Ce         | 0.9  |                         |   |    | 6.38  |    |
| Mg-Gd         | 5.0  | as-cast                 | 2 | ML | 58.5  | 42 |
|               |      | heat treated            |   |    | 31.75 |    |
| Mg-Nd         | 0.6  | as-cast                 |   |    | 5.12  |    |
|               |      | heat treated            |   |    | 23.9  |    |
| Mg-La         | 0.7  | as-cast                 |   |    | 17.05 |    |
|               |      | heat treated            |   |    | 3.42  |    |
| Mg-Ce         | 0.9  | as-cast                 |   |    | 10.6  |    |
|               |      | heat treated            |   |    | 7.55  |    |
| Mg-Y          | 5.0  | as-cast                 |   |    | 7.22  |    |
|               |      | heat treated            |   |    | 8.95  |    |
| MEZ           | 4.3  | sand-cast               | 4 | ML | 42    | 43 |
|               | 4.3  |                         |   |    | 6.2   |    |
| NZ30K         | 3.6  | as-cast                 | 4 | ML | 0.44  | 44 |
| Mg-Ge         | 0.1  | as-cast                 | 6 | ML | 1.68  | 45 |
|               | 0.3  |                         |   |    | 0.84  |    |

|               |       |              |   |    |       |    |
|---------------|-------|--------------|---|----|-------|----|
| Mg-Sn         | 0.5   |              |   |    | 4.2   |    |
| Mg-Pb         | 0.5   |              |   |    | 0.7   |    |
| Mg-Sb         | 0.2   |              |   |    | 1.05  |    |
|               | 0.3   |              |   |    | 1.26  |    |
| Mg-Bi         | 0.1   |              |   |    | 1.47  |    |
|               | 0.5   |              |   |    | 3.15  |    |
| AZ31          | 4.1   | wrought      | 8 | ML | 0.42  | 46 |
| AZ61          | 7.2   |              |   |    | 1.05  |    |
| Mg-Y-Nd       | 7.7   | as-cast      | 1 | ML | 36.75 | 47 |
|               | 8.1   |              |   |    | 25.51 |    |
|               | 8.6   |              |   |    | 16.69 |    |
| Mg-Li-Zn-Al   | 12.0  | as-cast      | 1 | ML | 25.2  | 48 |
| Mg-Ca         | 0.3   | as-cast      | 2 | ML | 0.99  | 49 |
|               |       | heat treated |   |    | 1.25  |    |
|               |       |              |   | HE | 0.81  |    |
|               |       |              |   |    | 0.51  |    |
| Mg-Ca         | 0.5   | as-cast      | 1 | ML | 0.2   | 50 |
|               |       |              |   |    | 0.31  |    |
|               |       |              |   | HE | 0.15  |    |
|               |       |              |   |    | 0.26  |    |
| AZ61          | 6.78  | as-cast      | 4 | ML | 7.16  | 51 |
|               |       | heat treated |   |    | 0.5   |    |
| AZ61-Ca       | 8.67  | as-cast      |   |    | 2.6   |    |
|               |       | heat treated |   |    | 0.86  |    |
| AZ61          | 6.78  | extruded     | 4 | ML | 0.68  | 52 |
|               |       | heat treated |   |    | 0.42  |    |
| AZ61-Ca       | 8.67  | extruded     |   |    | 1.21  |    |
|               |       | heat treated |   |    | 0.44  |    |
| AZ61-Ti       | 7.8   | as-cast      | 1 | ML | 1.51  | 53 |
|               | 7.5   |              |   |    | 30    |    |
|               | 7.6   |              |   |    | 12.6  |    |
| AZ91-Gd       | 10.55 | as-cast with | 1 | ML | 1.41  | 54 |
|               | 10.47 | ultrasonic   |   |    | 0.85  |    |
|               | 11.14 | vibration    |   |    | 0.6   |    |
|               | 11.35 |              |   |    | 0.76  |    |
| Mg-Gd-Y-Zn-Zr | 17.9  | heat treated | 1 | HE | 0.4   | 55 |
|               |       |              |   |    | 0.5   |    |
|               |       |              |   |    | 2.7   |    |
|               |       |              |   |    | 2.3   |    |

|             |      |              |   |    |       |    |
|-------------|------|--------------|---|----|-------|----|
| Mg-Gd-Zn-Zr | 17.6 | as-cast      | 2 | HE | 49.16 | 56 |
|             |      | heat treated |   |    | 6     |    |
| Mg-Gd-Zn-Zr | 17.6 | peak-aged    | 2 | HE | 7.02  | 57 |
|             |      | over-aged    |   |    | 4     |    |
| Mg-Zn-Gd-Zr | 14.6 | as-cast      | 1 | ML | 6     | 58 |
|             | 13.9 |              |   |    | 19.5  |    |
|             | 12.2 |              |   |    | 15    |    |
|             | 14.6 | extruded     |   |    | 4     |    |
|             | 13.9 |              |   |    | 8     |    |
|             | 12.2 |              |   |    | 5     |    |
| AZ91-Ca/Y   | 10.3 | die-cast     | 1 | ML | 0.12  | 59 |

Table S3 Chemical compositions of all prepared Mg-Ca alloys. The values are in ppm or in wt% when indicated. \* Data from reference.<sup>60</sup> \*\*Data from reference.<sup>61</sup>

|    | Mg-0.05Ca | Mg-0.1Ca | Mg-0.15Ca | HZG HP-Mg | Elektron 21 | AZ91   | UHP-Mg* | UQ HP-Mg** |
|----|-----------|----------|-----------|-----------|-------------|--------|---------|------------|
| Ca | 0.04%     | 0.09%    | 0.15%     | <1        | 5           | <1     | <1      | 30         |
| Fe | 16        | 13       | 14        | 51        | 7           | 13     | 2       | 20         |
| Cu | 7         | 11       | 7         | <1        | 10          | 19     | <1      | <20        |
| Ni | 7         | 5        | 8         | <2        | 6           | 5      | <1      | <10        |
| Si | 53        | 97       | 34        | <1        | <5          | 331    | 1       | 100        |
| Mn | 80        | 210      | 90        | 8         | 50          | 0.43%  | 2       | 170        |
| Al | 64        | 68       | 21        | 50        | 14          | 10.68% | 28      | 0.1%       |
| Zn | 18        | 16       | 20        | 10        | 0.25%       | 0.72%  | 48      | 30         |
| Zr | <3        | <3       | <3        | 23        | 0.48%       | 26     | <1      | -          |
| Nd | -         | -        | -         | -         | 2.69%       | -      | -       | -          |
| Gd | -         | -        | -         | -         | 1.04%       | -      | -       | -          |
| Mg | Bal.      | Bal.     | Bal.      | Bal.      | Bal.        | Bal.   | Bal.    | Bal.       |



## Reference

1. S.-M. Baek, H. J. Kim, H. Y. Jeong, S.-D. Sohn, H.-J. Shin, K.-J. Choi, K.-S. Lee, J. G. Lee, C. D. Yim, B. S. You, H.-Y. Ha and S. S. Park, *Corros. Sci.*, 2016, **112**, 44-53.
2. T. Zhang, Z. Ji and S. Wu, *Materials & Design*, 2011, **32**, 2742-2748.
3. N. N. Aung and W. Zhou, *Corros. Sci.*, 2010, **52**, 589-594.
4. C. Zhang, L. Wu, G. Huang, Y. Huang, B. Jiang, A. Atrens and F. Pan, *J. Alloys Compd.*, 2020, **823**, 153844.
5. S. Candan, M. Celik and E. Candan, *J. Alloys Compd.*, 2016, **672**, 197-203.
6. D. W. Li, H. Y. Wang, D. S. Wei, Z. X. Zhao and Y. Liu, *ACS Omega*, 2020, **5**, 1448-1456.
7. B. Jiang, Q. Xiang, A. Atrens, J. Song and F. Pan, *Corros. Sci.*, 2017, **126**, 374-380.
8. L. Huang, K. Wang, W. Wang, P. Peng, K. Qiao and Q. Liu, *Mater. Corros.*, 2019, **71**, 93-108.
9. X. Lu, Y. Li, P. Ju, Y. Chen, J. Yang, K. Qian, T. Zhang and F. Wang, *Corros. Sci.*, 2019, **148**, 264-271.
10. J.-W. Chang, P.-H. Fu, X.-W. Guo, L.-M. Peng and W.-J. Ding, *Corros. Sci.*, 2007, **49**, 2612-2627.
11. A. Pardo, M. C. Merino, A. E. Coy, R. Arrabal, F. Viejo and E. Matykina, *Corros. Sci.*, 2008, **50**, 823-834.
12. R. Arrabal, A. Pardo, M. C. Merino, M. Mohedano, P. Casajús, K. Paucar and G. Garcés, *Corros. Sci.*, 2012, **55**, 301-312.
13. E. Aghion and N. Lulu, *Mater. Charact.*, 2010, **61**, 1221-1226.
14. M. Ben-Haroush, G. Ben-Hamu, D. Eliezer and L. Wagner, *Corros. Sci.*, 2008, **50**, 1766-1778.
15. R. H. Buzolin, P. Volovitch, A. Maltseva, S. Lamaka, C. Blawert, C. L. Mendis, A. Lohmüller, K. U. Kainer and N. Hort, *Mater. Corros.*, 2020, **71**, 339-351.
16. W. Liu, F. Cao, L. Zhong, L. Zheng, B. Jia, Z. Zhang and J. Zhang, *Mater. Corros.*, 2009, **60**, 795-803.
17. A. Srinivasan, S. Ningshen, U. Kamachi Mudali, U. T. S. Pillai and B. C. Pai, *Intermetallics*, 2007, **15**, 1511-1517.
18. H. Altun and S. Sen, *Materials & Design*, 2004, **25**, 637-643.
19. G. Song, A. L. Bowles and D. H. StJohn, *Materials Science and Engineering: A*, 2004, **366**, 74-86.
20. C. Q. Li, D. K. Xu, X. B. Chen, B. J. Wang, R. Z. Wu, E. H. Han and N. Birbilis, *Electrochim. Acta* 2018, **260**, 55-64.
21. Q. Xiang, B. Jiang, Y. Zhang, X. Chen, J. Song, J. Xu, L. Fang and F. Pan, *Corros. Sci.*, 2017, **119**, 14-22.
22. Y. He, C. Peng, Y. Feng, R. Wang and J. Zhong, *J. Alloys Compd.*, 2020, DOI: 10.1016/j.jallcom.2020.154344, 154344.
23. J. Li, Y. Yang, H. Deng, M. Li, J. Su, F. Hu, X. Xiong and X. Peng, *J. Alloys Compd.*, 2020, **823**, 153839.
24. W. Xu, N. Birbilis, G. Sha, Y. Wang, J. E. Daniels, Y. Xiao and M. Ferry, *Nat. Mater.*, 2015, **14**, 1229-1235.
25. L. Gao, C. Zhang, M. Zhang, X. Huang and N. Sheng, *J. Alloys Compd.*, 2009, **468**, 285-289.
26. Y. Sun, R. Wang, C. Peng and X. Wang, *Mater. Charact.*, 2020, **159**, 110031.
27. Y. Sun, R. Wang, C. Peng and Z. Cai, *Corros. Sci.*, 2020, DOI: 10.1016/j.corsci.2020.108487, 108487.
28. X. Lei, R. Wang, C. Peng, Y. Feng and Y. Sun, *Transactions of the Indian Institute of Metals*, 2019, **72**, 2893-2899.
29. Wang, Song, Li, Klu, Qiao, Sun, Jiang and Ma, *Metals*, 2019, **9**, 920.
30. A. Soltan, M. S. Dargusch, Z. Shi, D. Gerrard and A. Atrens, *Mater. Corros.*, 2019, **70**, 1527-1552.
31. J. Zhang, J. Wang, X. Qiu, D. Zhang, Z. Tian, X. Niu, D. Tang and J. Meng, *J. Alloys Compd.*, 2008, **464**, 556-564.
32. J. Liu, E. H. Han, Y. Song and D. Shan, *J. Alloys Compd.*, 2018, **757**, 356-363.
33. G. R. Argade, S. K. Panigrahi and R. S. Mishra, *Corros. Sci.*, 2012, **58**, 145-151.
34. J. Chang, X. Guo, S. He, P. Fu, L. Peng and W. Ding, *Corros. Sci.*, 2008, **50**, 166-177.

35. P.-W. Chu and E. A. Marquis, *Corros. Sci.* , 2015, **101**, 94-104.
36. M. Liu, P. Schmutz, P. J. Uggowitzer, G. Song and A. Atrens, *Corros. Sci.* , 2010, **52**, 3687-3701.
37. Y. Luo, Y. Deng, L. Guan, L. Ye and X. Guo, *Materials & Design*, 2020, **186**, 108289.
38. K. Schlüter, Z. Shi, C. Zamponi, F. Cao, E. Quandt and A. Atrens, *Corros. Sci.* , 2014, **78**, 43-54.
39. A. Kielbus, *Journal of Achievements in Materials and manufacturing Engineering*, 2007, **22**, 29-32.
40. M.-C. Zhao, M. Liu, G.-L. Song and A. Atrens, *Corros. Sci.* , 2008, **50**, 3168-3178.
41. F. Cao, Z. Shi, G.-L. Song, M. Liu, M. S. Dargusch and A. Atrens, *Corros. Sci.* , 2015, **90**, 176-191.
42. Z. Shi, F. Cao, G.-L. Song, M. Liu and A. Atrens, *Corros. Sci.* , 2013, **76**, 98-118.
43. G. Song and D. StJohn, *J. Light Met.* , 2002, **2**, 1-16.
44. J. W. Chang, L. M. Peng, X. W. Guo, A. Atrens, P. H. Fu, W. J. Ding and X. S. Wang, *J. Appl. Electrochem.* , 2007, **38**, 207-214.
45. R. L. Liu, J. R. Scully, G. Williams and N. Birbilis, *Electrochim. Acta* 2018, **260**, 184-195.
46. A. Samaniego, I. Llorente and S. Feliu, *Corros. Sci.* , 2013, **68**, 66-71.
47. Q. Jiang, X. Lv, D. Lu, J. Zhang and B. Hou, *Journal of Magnesium and Alloys*, 2018, **6**, 346-355.
48. L. Yang, Q. Jiang, M. Zheng, B. Hou and Y. Li, *Journal of Magnesium and Alloys*, 2016, **4**, 22-26.
49. F. Cao, Z. Shi, G.-L. Song, M. Liu and A. Atrens, *Corros. Sci.* , 2013, **76**, 60-97.
50. M. Deng, D. Höche, S. V. Lamaka, L. Wang and M. L. Zheludkevich, *Corros. Sci.* , 2019, **153**, 225-235.
51. m. Yuasa, X. Huang, K. Suzuki, N. Satio and Y. Chino, *Mater. Trans.* , 2018, **59**.
52. M. Yuasa, E. Yukutake, X. Huang, K. Suzuki and N. Satio, *Mater. Trans.* , 2017, **58**.
53. J. Y. Choi and W. J. Kim, *J. Alloys Compd.* , 2014, **614**, 49-55.
54. Z. Yin, Y. Chen, H. Yan, G.-h. Zhou, X.-q. Wu and Z. Hu, *J. Alloys Compd.* , 2019, **783**, 877-885.
55. L. Wu and H. Li, *Corros. Sci.* , 2018, **142**, 238-248.
56. J. Liu, L. Yang, C. Zhang, B. Zhang, T. Zhang, Y. Li, K. Wu and F. Wang, *J. Alloys Compd.* , 2019, **782**, 648-658.
57. J. Liu, L. Yang, C. Zhang, B. Zhang, T. Zhang, Y. Li, K. Wu and F. Wang, *Journal of Materials Science & Technology*, 2019, **35**, 1644-1654.
58. S. Yin, W. Duan, W. Liu, L. Wu, J. Yu, Z. Zhao, M. Liu, P. Wang, J. Cui and Z. Zhang, *Corros. Sci.* , 2020, **166**, 108419.
59. S. K. Woo, C. Blawert, K. A. Yasakau, S. Yi, N. Scharnagl, B.-C. Suh, Y. M. Kim, B. Sun You and C. Dong Yim, *Corros. Sci.* , 2020, **166**, 108451.
60. F. Cao, Z. Shi, J. Hofstetter, P. J. Uggowitzer, G. Song, M. Liu and A. Atrens, *Corros. Sci.* , 2013, **75**, 78-99.
61. Z. Shi and A. Atrens, *Corros. Sci.* , 2011, **53**, 226-246.
